# Supplementary material for: Synergistic multi-selective photocatalysis and real-time optical thermometry of CsPbBr3/BiOI/TiO2@PAN flexible nanofibers
Source: Royal Society of Chemistry journal article supplement (doi:10.1039/d3ta04964g), 2023-01-01
Supplement: d3ta04964g1.pdf [file d3ta04964g1.pdf]

## Supporting information:

### Synergistic multi-selective photocatalysis and real-time optical thermometry of

### CsPbBr<sub>3</sub>/BiOI/TiO<sub>2</sub>@PAN flexible nanofibers

Yanyan Li <sup>a</sup>, Lifan Shen <sup>a, b, \*</sup>, Edwin Yue Bun Pun <sup>c</sup>, Hai Lin <sup>a, c, \*</sup>

<sup>a</sup> School of Textile and Material Engineering, Dalian Polytechnic University, Dalian, 116034, P.R. China

<sup>b</sup> College of Microelectronics and Key Laboratory of Optoelectronics Technology, Faculty of Information Technology, Beijing University of Technology, Beijing, 100124, P.R. China

<sup>c</sup> Department of Electrical Engineering and State Key Laboratory of Terahertz and Millimeter Waves, City University of Hong Kong, Hong Kong Special Administrative Region, P.R. China

#### Corresponding Authors

\* E-mail: shenlifan@bjut.edu.cn (Lifan Shen)

\* E-mail: linhaidlpu@163.com (Hai Lin)

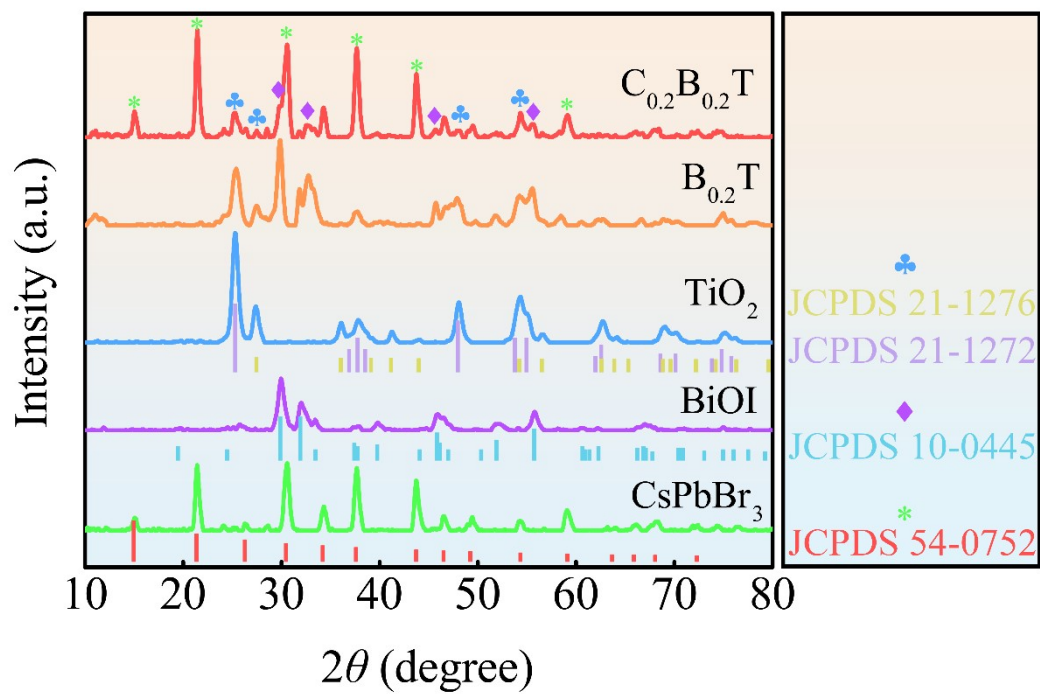

**Figure S1.** XRD patterns of pristine  $TiO_2$ , bare  $BiOI$ , initial  $CsPbBr_3$ ,  $B_{0.2}T$  and  $C_{0.2}B_{0.2}T$  NCs.

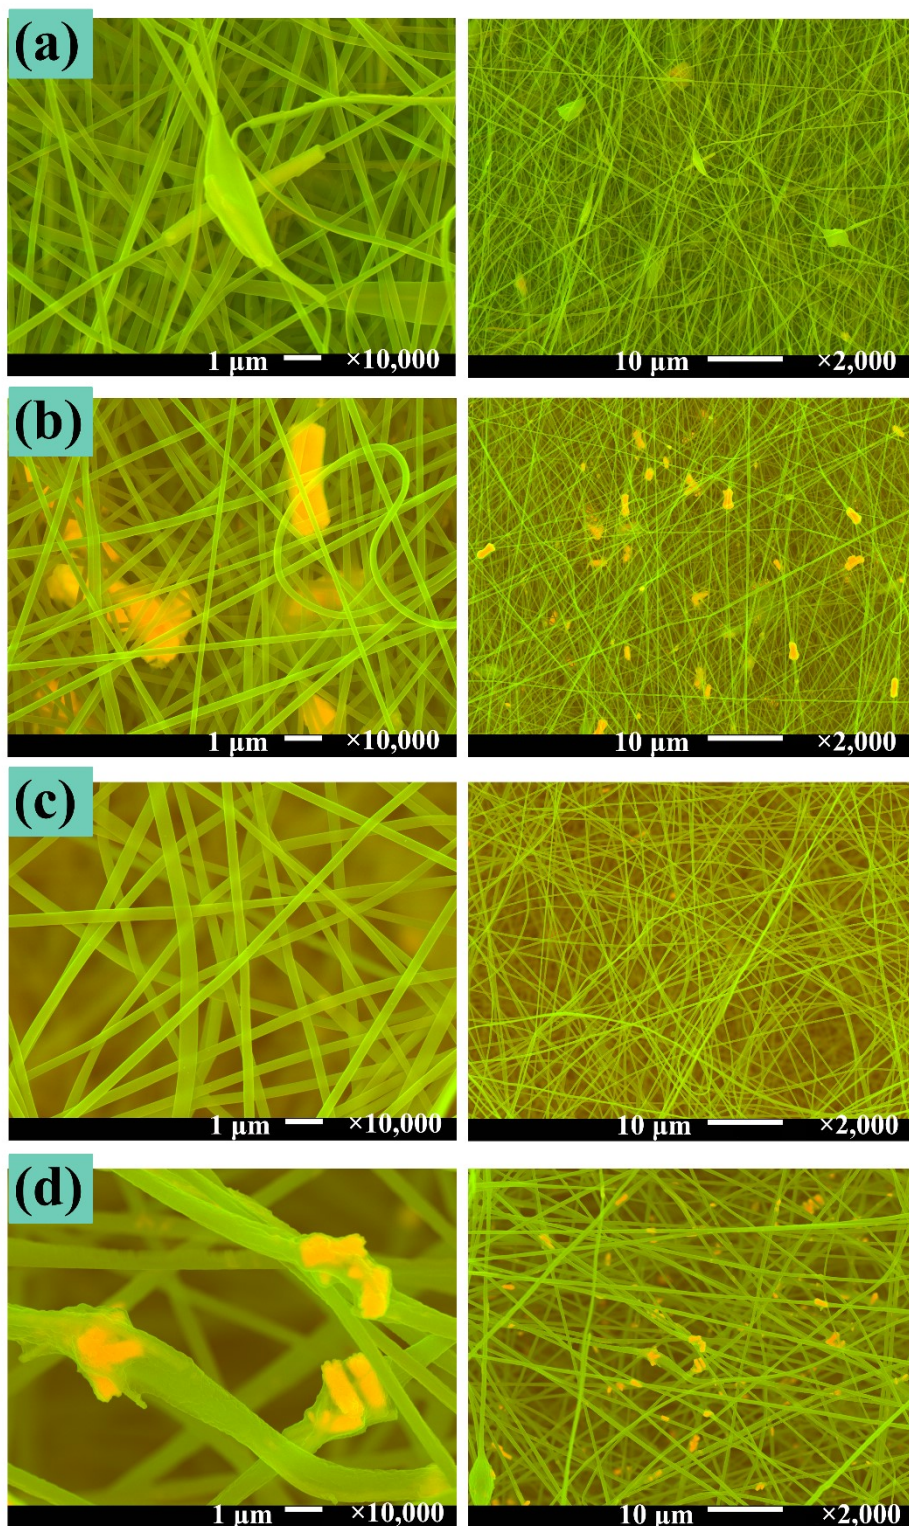

**Figure S2.** SEM images of TiO<sub>2</sub>@PAN (a), BiOI@PAN (b), CsPbBr<sub>3</sub>@PAN (c) and B<sub>0.2</sub>T@PAN (d) nanofibers, at different magnifications.



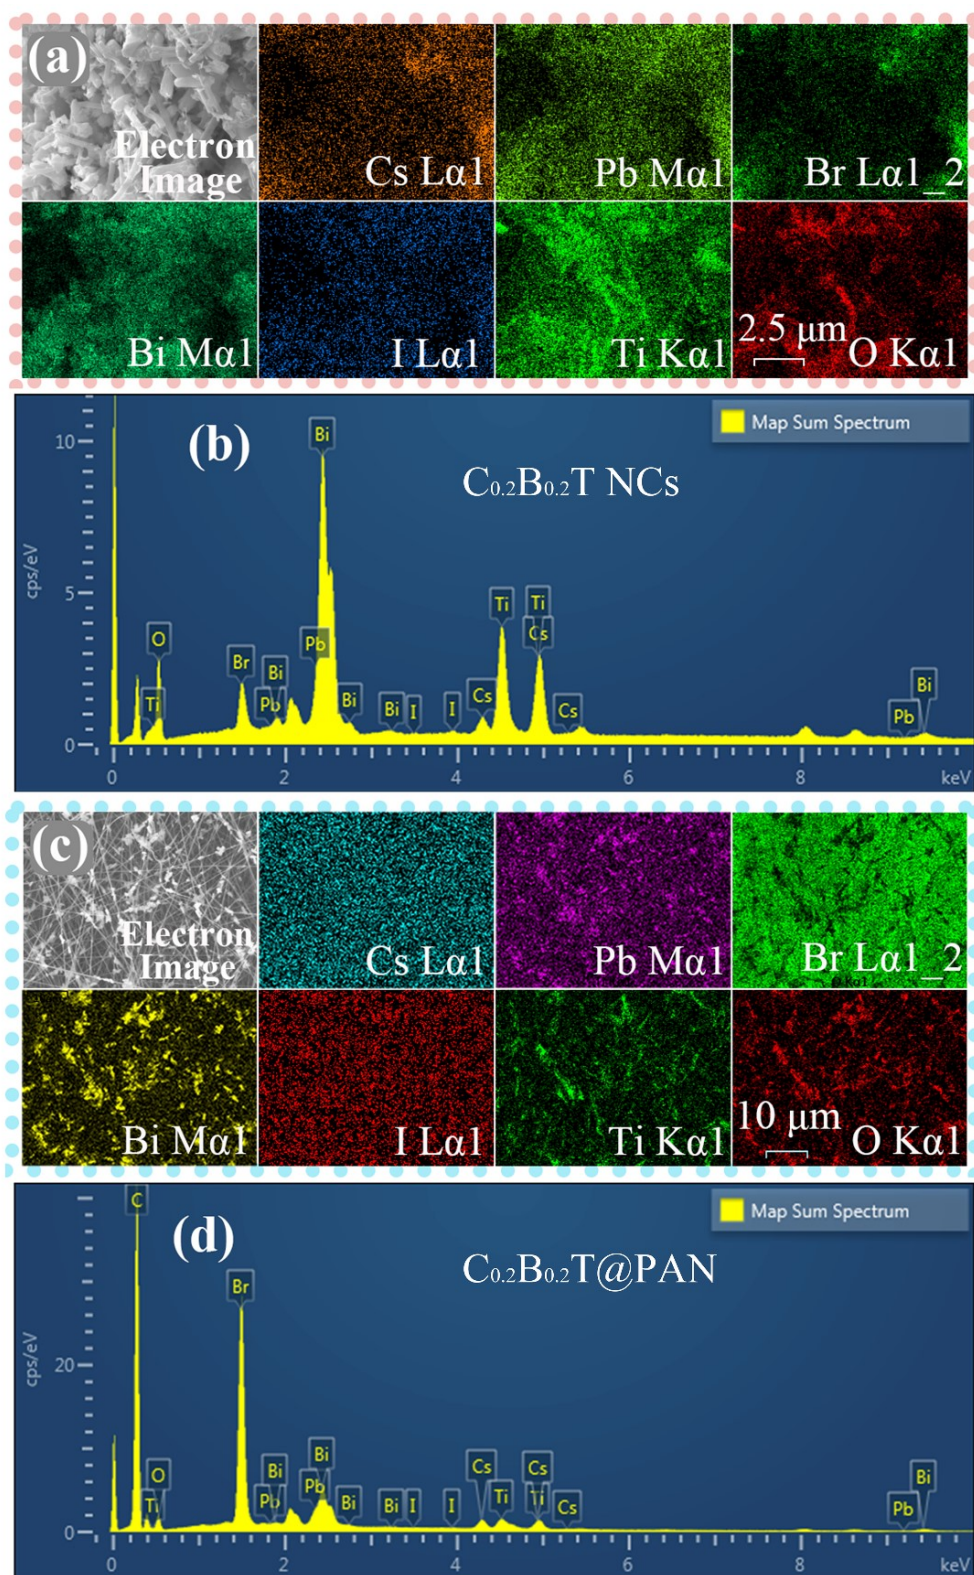

**Figure S3.** Elemental mapping and EDS spectrum of  $C_{0.2}B_{0.2}T$  NCs (a, b) and  $C_{0.2}B_{0.2}T@PAN$  nanofibers (c, d).

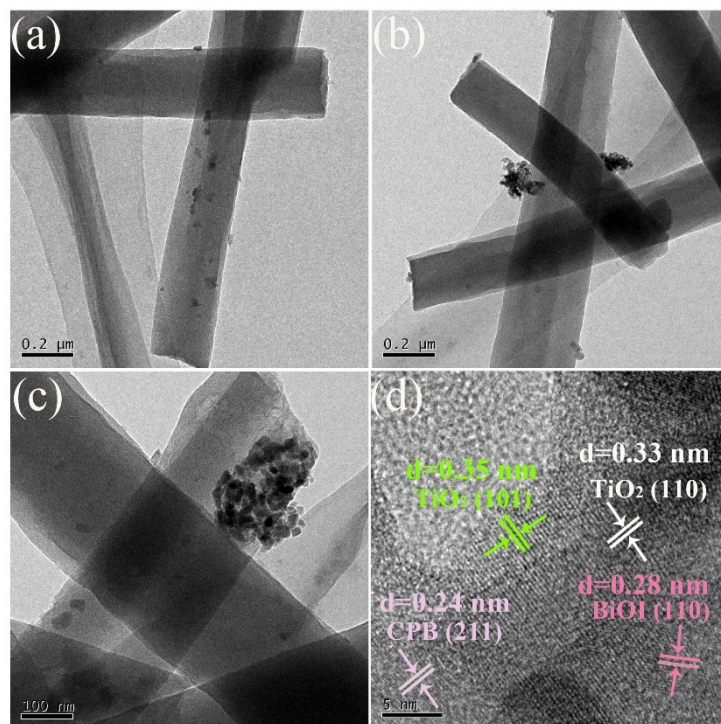

**Figure S4.** TEM images (a-c) and HRTEM image (d) of  $C_{0.2}B_{0.2}T@PAN$  nanofibers.

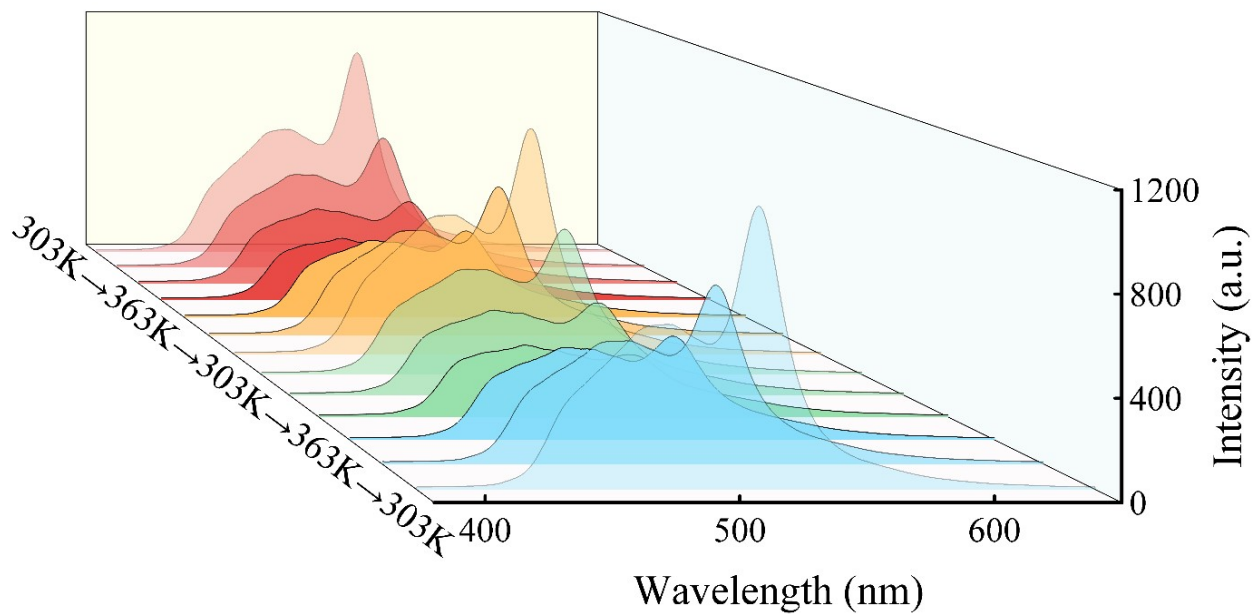

**Figure S5.** Temperature-dependent spectra of C<sub>0.2</sub>B<sub>0.2</sub>T@PAN nanofibers from 303 K to 363 K under 365 nm excitation.

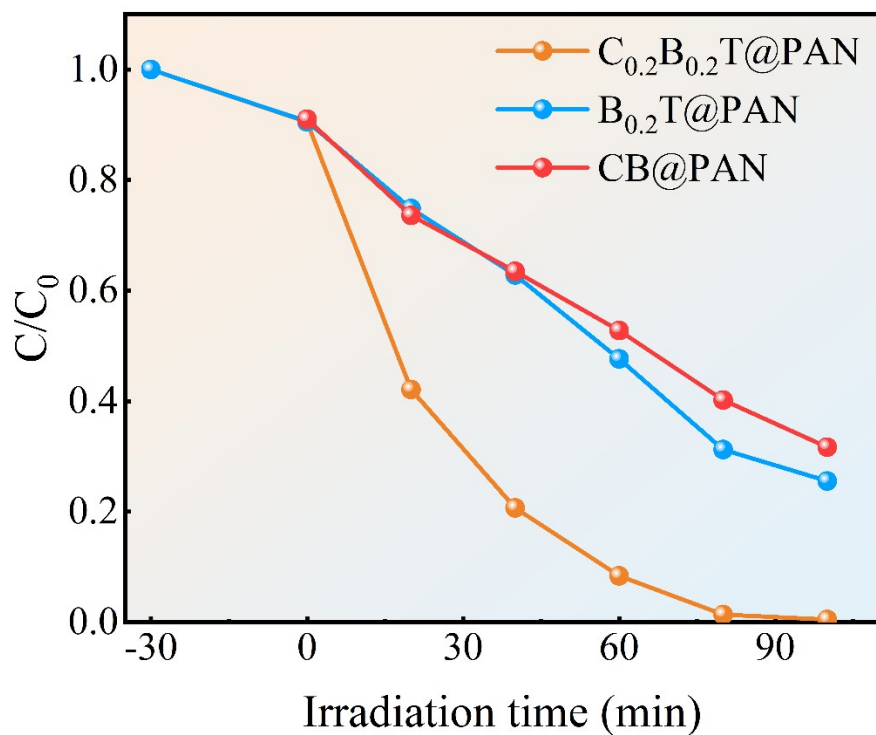

**Figure S6.** Photocatalytic degradation curves over as-prepared different catalysts for degradation of RhB utilizing simulated sunlight irradiation.

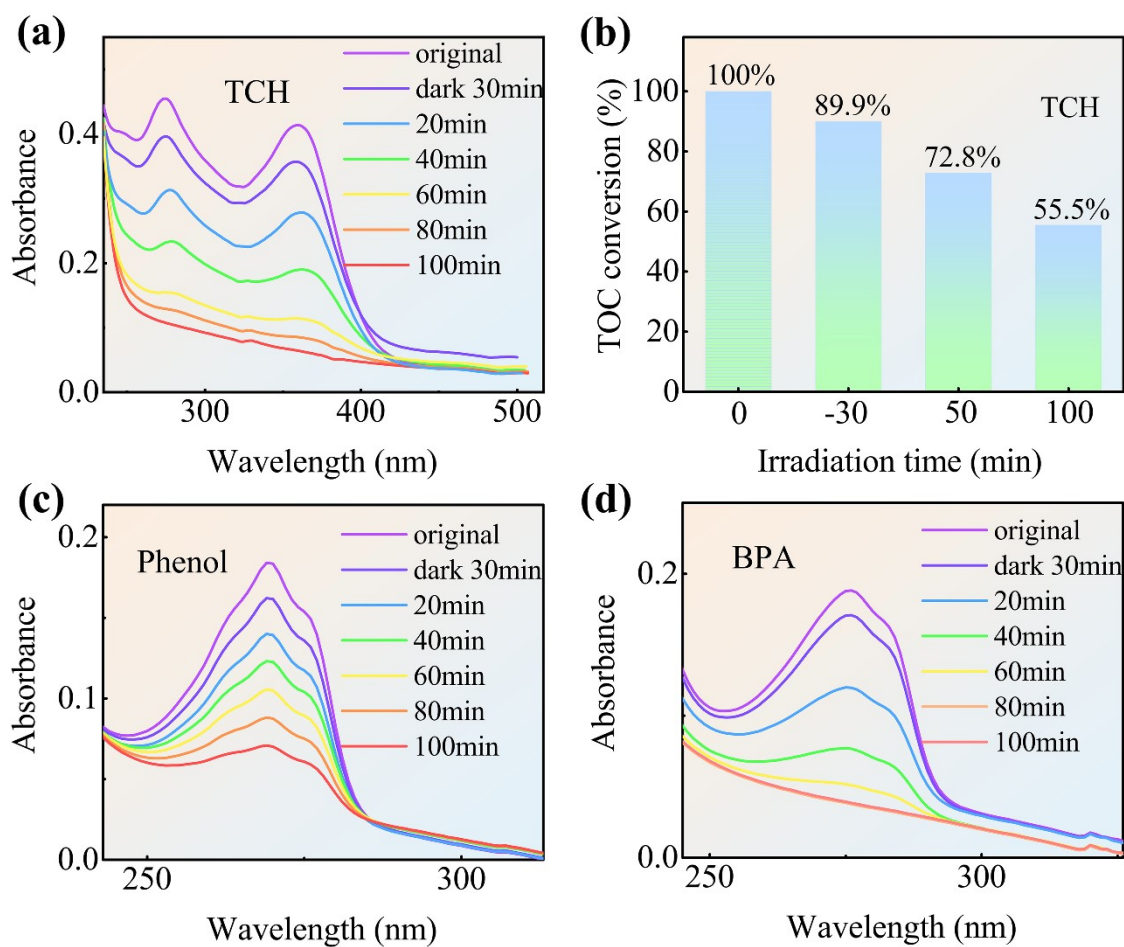

**Figure S7.** UV-vis spectral change of TCH (a), phenol (c) and BPA (d) over  $C_{0.2}B_{0.2}T@PAN$  nanofibers with different irradiation time. (b) The TOC contents of TCH solutions during the elimination reaction over the  $C_{0.2}B_{0.2}T@PAN$  nanofibers photocatalyst.



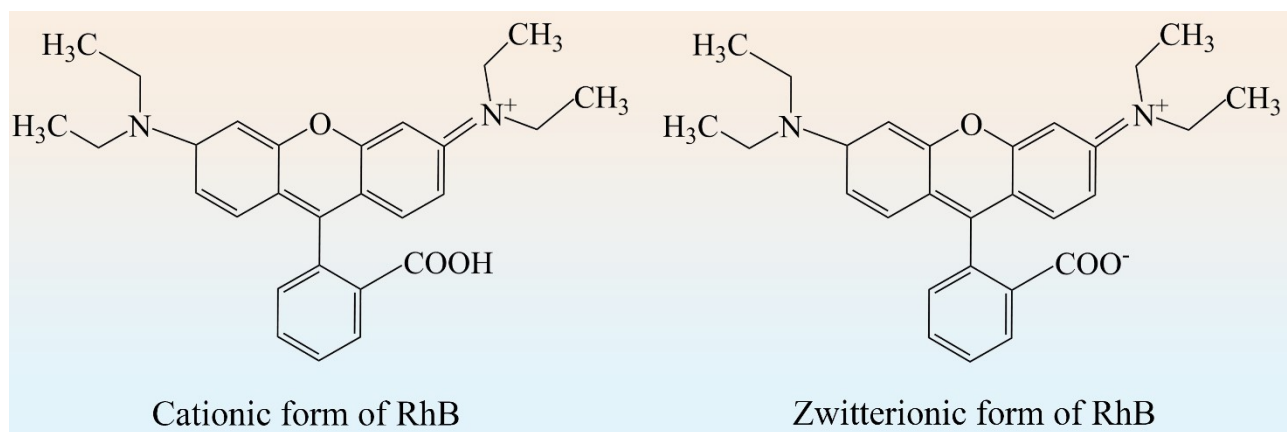

**Figure S8.** Chemical structure of different forms of RhB.

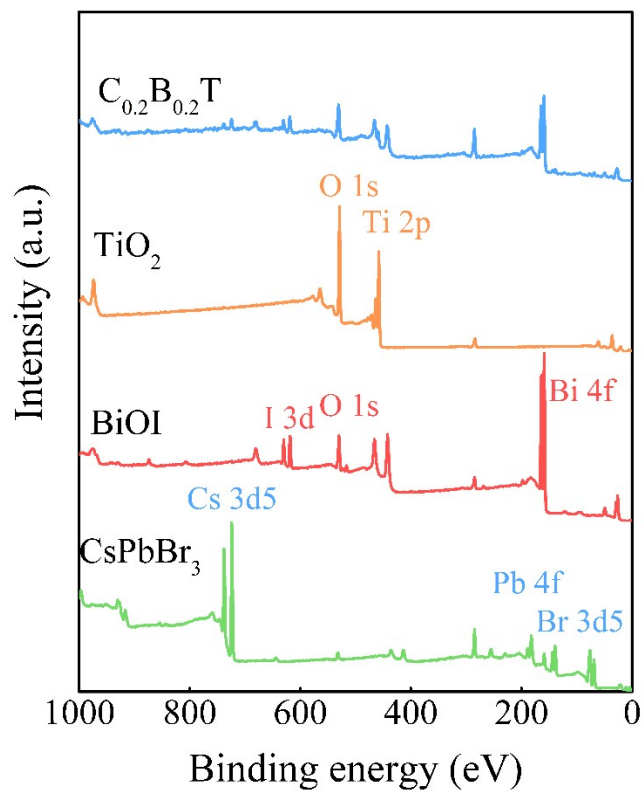

**Figure S9.** XPS full spectra of BiOI,  $CsPbBr_3$ ,  $TiO_2$  and  $C_{0.2}B_{0.2}T$ .

**Table S1.** Lattice constant of the prepared samples.

| Sample              | Lattice constant |         |         |
|---------------------|------------------|---------|---------|
|                     | a/Å              | b/Å     | c/Å     |
| CsPbBr <sub>3</sub> | 5.83864          | 5.83864 | 5.83864 |
| TiO <sub>2</sub>    | 4.59035          | 4.59035 | 2.95504 |
| BiOI                | 3.994            | 3.994   | 9.149   |

**Table S2.** Atomic percentage content table of C<sub>0.2</sub>B<sub>0.2</sub>T NCs by XPS.

| Element | Atomic % |
|---------|----------|
| C       | 48.13    |
| O       | 26.8     |
| Ti      | 14.88    |
| Bi      | 5.02     |
| I       | 1.35     |
| Cs      | 0.76     |
| Pb      | 0.40     |
| Br      | 2.67     |

**Table S3.** The BET analysis results of the C<sub>0.2</sub>B<sub>0.2</sub>T NCs and C<sub>0.2</sub>B<sub>0.2</sub>T@PAN nanofibers.

| Sample                                                | Specific surface area<br>(m <sup>2</sup> /g) | BJH desorption pore volume<br>(cm <sup>3</sup> /g) |
|-------------------------------------------------------|----------------------------------------------|----------------------------------------------------|
| C <sub>0.2</sub> B <sub>0.2</sub> T NCs               | 6.88                                         | 0.12                                               |
| C <sub>0.2</sub> B <sub>0.2</sub> T@PAN<br>nanofibers | 11.19                                        | 0.13                                               |

**Table S4.** The absorbance of samples with adsorption time of 10, 20, 30, 40 and 50 min under dark condition.

|                                      | 10 min | 20 min | 30 min | 40 min | 50 min |
|--------------------------------------|--------|--------|--------|--------|--------|
| PAN                                  | 0.984  | 0.951  | 0.908  | 0.909  | 0.908  |
| TiO <sub>2</sub>                     | 0.993  | 0.968  | 0.927  | 0.928  | 0.927  |
| BiOI                                 | 0.982  | 0.946  | 0.905  | 0.905  | 0.906  |
| CsPbBr <sub>3</sub>                  | 0.986  | 0.954  | 0.915  | 0.916  | 0.915  |
| B <sub>0.05</sub> T                  | 0.990  | 0.958  | 0.917  | 0.917  | 0.918  |
| B <sub>0.1</sub> T                   | 0.981  | 0.950  | 0.907  | 0.907  | 0.906  |
| B <sub>0.2</sub> T                   | 0.979  | 0.948  | 0.906  | 0.905  | 0.905  |
| B <sub>0.4</sub> T                   | 0.989  | 0.959  | 0.916  | 0.915  | 0.914  |
| C <sub>0.05</sub> B <sub>0.2</sub> T | 0.983  | 0.951  | 0.908  | 0.907  | 0.907  |
| C <sub>0.1</sub> B <sub>0.2</sub> T  | 0.976  | 0.946  | 0.902  | 0.903  | 0.903  |
| C <sub>0.2</sub> B <sub>0.2</sub> T  | 0.972  | 0.943  | 0.905  | 0.905  | 0.906  |
| C <sub>0.4</sub> B <sub>0.2</sub> T  | 0.982  | 0.952  | 0.906  | 0.905  | 0.904  |



**Table S5.** Goodness of fit ( $R^2$ ) and apparent rate constant ( $k$ ) of RhB degradation.

| photocatalyst                        | $R^2$   | $k$ ( $\text{min}^{-1}$ ) |
|--------------------------------------|---------|---------------------------|
| TiO <sub>2</sub>                     | 0.93375 | 0.00031                   |
| BiOI                                 | 0.99915 | 0.00502                   |
| CsPbBr <sub>3</sub>                  | 0.99556 | 0.00118                   |
| B <sub>0.05</sub> T                  | 0.94163 | 0.01156                   |
| B <sub>0.1</sub> T                   | 0.94669 | 0.01192                   |
| B <sub>0.2</sub> T                   | 0.96221 | 0.01277                   |
| B <sub>0.4</sub> T                   | 0.93868 | 0.01149                   |
| C <sub>0.05</sub> B <sub>0.2</sub> T | 0.97941 | 0.02702                   |
| C <sub>0.1</sub> B <sub>0.2</sub> T  | 0.97516 | 0.03909                   |
| C <sub>0.2</sub> B <sub>0.2</sub> T  | 0.95682 | 0.05181                   |
| C <sub>0.4</sub> B <sub>0.2</sub> T  | 0.97672 | 0.03271                   |

**Table S6.** Comparison of photocatalytic degradation for pollutants of the C<sub>0.2</sub>B<sub>0.2</sub>T@PAN nanofibers with the reported materials.

| Photocatalyst                                                                | C <sub>0</sub> of pollutant<br>[mg·L <sup>-1</sup> ] | Irradiation<br>light | Time<br>[min] | Catalyst<br>amount<br>[mg·mL <sup>-1</sup> ] | Removal<br>efficiency<br>[%] | Degradation<br>rate constant <i>k</i><br>[min <sup>-1</sup> ] | References |
|------------------------------------------------------------------------------|------------------------------------------------------|----------------------|---------------|----------------------------------------------|------------------------------|---------------------------------------------------------------|------------|
| CsPbBr <sub>3</sub> /BiOI/TiO <sub>2</sub><br>nanofibers                     | RhB, 5                                               | Vis                  | 100           | 0.5                                          | 99.5                         | 0.0518                                                        | This work  |
| CsPbBr <sub>3</sub> /BiOI/TiO <sub>2</sub><br>nanofibers                     | TCH, 10                                              | Vis                  | 100           | 0.5                                          | 97.7                         | /                                                             | This work  |
| ZnO@AC@FeO                                                                   | BPA, 30                                              | UVC                  | 60            | 0.4                                          | 95.6                         | 0.0400                                                        | [17]       |
| CsPbBr <sub>3</sub> /BiOI/TiO <sub>2</sub><br>nanofibers                     | BPA, 10                                              | Vis                  | 100           | 0.5                                          | 95.2                         | /                                                             | This work  |
| g-C <sub>3</sub> N <sub>4</sub> /Ag <sub>2</sub> CO <sub>3</sub> /GO         | TC, 20                                               | Vis                  | 100           | 0.6                                          | 97.6                         | 0.0268                                                        | [19]       |
| NH <sub>4</sub> F/Bi <sub>2</sub> WO <sub>6</sub>                            | RhB, 4.8                                             | Vis                  | 110           | 1                                            | 90.0                         | 0.0158                                                        | [14]       |
| biochar/2Zn <sub>3</sub> In <sub>2</sub> S <sub>6</sub> /<br>WO <sub>3</sub> | RhB, 30                                              | Vis                  | 120           | 0.1                                          | 80.5                         | 0.0120                                                        | [66]       |
| WO <sub>3</sub> @TiO <sub>2</sub> -SiO <sub>2</sub>                          | PHE, 500                                             | Vis                  | 180           | 0.5                                          | 58.8                         | 0.0047                                                        | [11]       |
| g-C <sub>3</sub> N <sub>4</sub> /TiO <sub>2</sub> films                      | MB, 10                                               | Vis                  | 180           | /                                            | 68.0                         | /                                                             | [10]       |
| TiO <sub>2</sub> /BiOI/Ag                                                    | MO, 15                                               | Solar                | 180           | /                                            | 93.3                         | /                                                             | [23]       |
